# Supplementary material for: Fe3+ facilitating the response of NiO towards H2S
Source: Royal Society of Chemistry journal article supplement (doi:10.1039/c4ra00182f), 2014-01-01
Supplement: c4ra00182f1.pdf [file c4ra00182f1.pdf]

# Supporting Information

## **Fe<sup>3+</sup> Facilitating the Response of NiO towards H<sub>2</sub>S**

Fang Li, Yuejiao Chen and Jianmin Ma\*

*Key Laboratory for Micro-Nano Optoelectronic Devices of Ministry of Education, State  
Key Laboratory for Chemo/Biosensing and Chemometrics, Hunan University, Changsha,  
P. R. China. E-mail: nanoelechem@hnu.edu.cn (J. M. Ma).*

# Supporting Information

## ***Experimental***

All the chemicals were of analytical grade and used without further purification.

### ***Synthesis of the Fe<sub>2</sub>O<sub>3</sub> loaded NiO nanoplates***

The synthesis of Fe<sub>2</sub>O<sub>3</sub> loaded NiO nanoplates is involved with two steps: 1) the synthesis of NiO nanoplates. The synthesis of NiO nanoplates was based on our previous work.<sup>1</sup> Typically, the hydrothermally proceeded Ni(OH)<sub>2</sub> could be obtained from the reaction system with 1.45 g Ni(NO<sub>3</sub>)<sub>3</sub>·6H<sub>2</sub>O, 3 ml n-butylamine and 12 ml distilled water at 180 °C for 12 h, and then the as-obtained Ni(OH)<sub>2</sub> nanoplates can be converted to NiO nanoplates through annealing process at 320 °C for 4 h with the heating rate of 5 °C /min; 2) 0.2 g of the as-synthesized NiO nanoplates was immersed in 10 ml of 1 mol/l Fe(NO<sub>3</sub>)<sub>3</sub>·9H<sub>2</sub>O for 2 h, and then the resulting precipitate was collected by centrifugation, and heated at 100 °C for 2 h and 250 °C for 4 h in air with a heating rate of 5 °C /min in a muffle furnace, and cooled to room temperature naturally.

### ***Characterization***

The morphology and structural characteristics were observed using X-ray diffraction (XRD, Rigaku D/max 2500 diffractometer), scanning electron microscopy (SEM, Hitachi S4800) and transmission electron microscope (TEM; JEOL 2010 with an accelerating voltage of 200 kV).

### ***Gas sensing measurements***

The fabrication and testing principles of the gas sensor are similar to that described in our previous reports.<sup>2</sup> Firstly, the gas-sensing samples were mixed with terpineol to form a paste and then coated onto the outside surface of an alumina tube with a diameter of 1 mm and a length of 5 mm. A platinum coil through the tube was employed as a heater to control the operating temperature. To improve their stability and repeatability, the gas sensors were

aged at 300 °C for 10 h in air. Here, the sensing properties of the sensors were measured by a NS-4003 series gas-sensing measurement system (China Zhong-Ke Micro-nano IOT, Internet of Things, Ltd.). The relative humidity (RH) is about 45%. The response and recovery times were defined as the time required for a change of the resistance to reach 90 % of the equilibrium value after injecting and that for removing the detected gas, respectively. When air and ppm-level target gas were flowed through the sensor element, the corresponding steady-state resistances of the sensor in air ( $R_{\text{air}}$ ) and in the air–gas mixture ( $R_{\text{gas}}$ ) were recorded, respectively. The as-fabricated Fe<sub>2</sub>O<sub>3</sub> loaded NiO or NiO sensor gas response ( $S$ ) for reducing gases (H<sub>2</sub>S, CH<sub>4</sub>, SO<sub>2</sub> or CO) is defined as the ratio of  $R_{\text{gas}}/R_{\text{air}}$ .

### **References**

- 1 J. M. Ma, J. Q. Yang, L. F. Jiao, Y. H. Mao, T. H. Wang, X. C. Duan, J. B. Lian and W. J. Zheng, *CrystEngComm*, 2012, **14**, 453-459.
- 2 J. W. Deng, J. M. Ma, L. Mei, Y. J. Tang, Y. J. Chen, T. Lv, Z. Xu and T. H. Wang, *J. Mater. Chem. A*, 2013, **1**, 12400-12403.

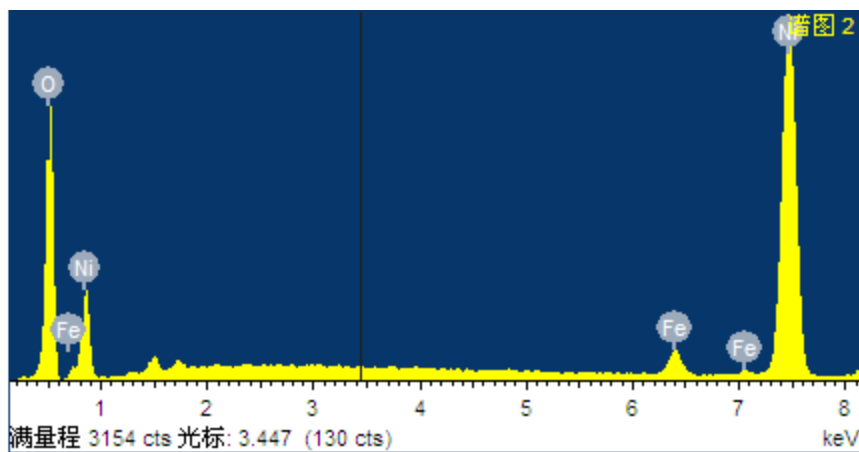

**Fig. S1** EDX spectrum of Fe<sub>2</sub>O<sub>3</sub>-loaded NiO nanoplates.
